# Supplementary material for: All-sputtered oxide thin-film transistors fabricated at 150 °C using simultaneous ultraviolet and thermal treatment
Source: Royal Society of Chemistry journal article supplement (doi:10.1039/c7tc04642a), 2017-12-06
Supplement: c7tc04642a1.pdf [file c7tc04642a1.pdf]

## Supporting Information

### **All-sputtered oxide thin-film transistors fabricated at 150°C using a simultaneous ultraviolet and thermal treatment**

*Young Jun Tak<sup>a, ‡</sup>, Si Joon Kim<sup>b, ‡</sup>, Kwon Sera<sup>c</sup>, Hee jun Kim<sup>a</sup>, Kwun-Bum Chung<sup>c, \*</sup>, Hyun Jae Kim<sup>a, \*</sup>*

*<sup>a</sup>School of Electrical and Electronic Engineering, Yonsei University, 50 Yonsei-ro, Seodaemun-gu, Seoul 120-749, Republic of Korea.*

*<sup>b</sup>Department of Materials Science and Engineering, The University of Texas at Dallas, 800 W. Campbell Road, Richardson, Texas 75080-3021, United States.*

*<sup>c</sup>Division of Physics and Semiconductor Science, Dongguk University, Seoul, 100-715, Korea*

*\*E-mail: kbchung@dongguk.edu; hjk3@yonsei.ac.kr*

*[<sup>‡</sup>]Y. J. Tak and Dr S. J. Kim contributed equally to this work.*

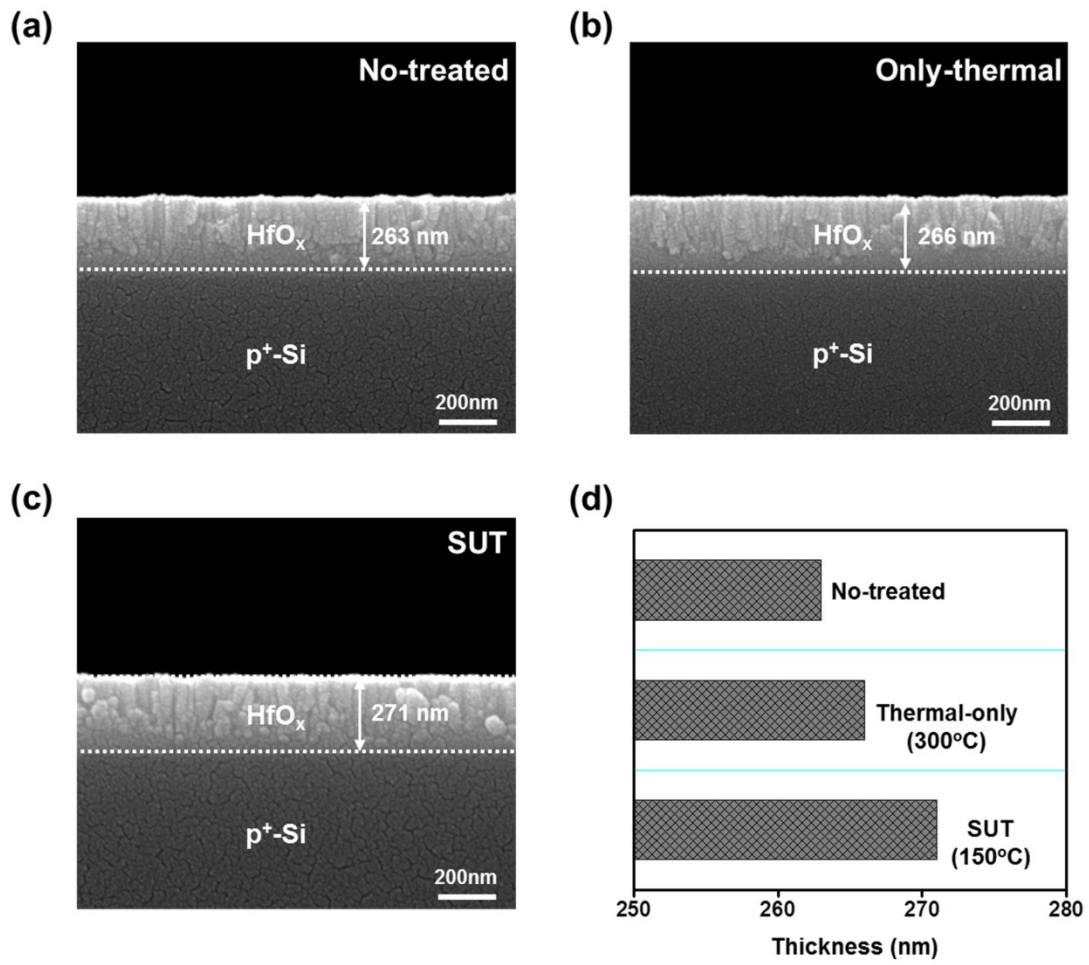

**Figure S1.** SEM images of the (a) non-, (b) thermal-only, and (C) SUT-treated HfO<sub>x</sub> films deposited over 40 min. (d) summarized thickness of all HfO<sub>x</sub> films

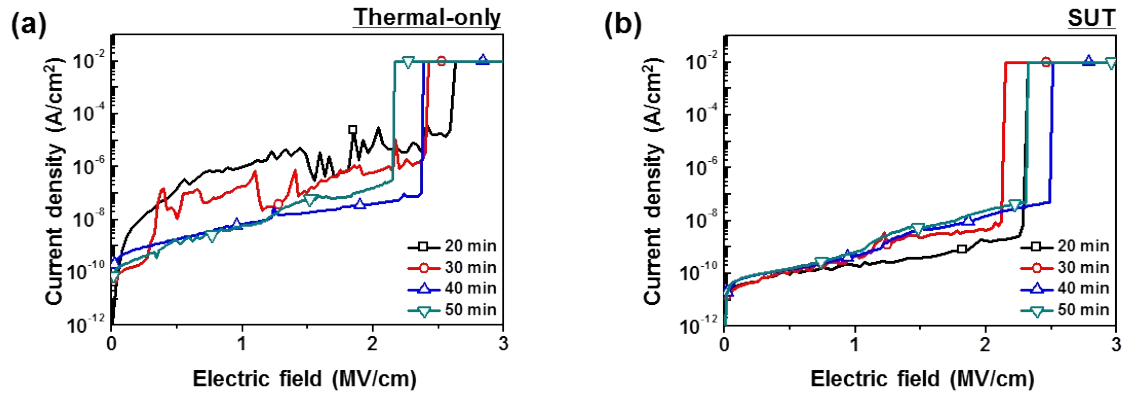

**Figure S2.** Leakage current density versus the electric field of (a) thermal-only treated HfO<sub>x</sub> films with deposition times (300°C) (b) SUT treated HfO<sub>x</sub> films with deposition times (150°C)

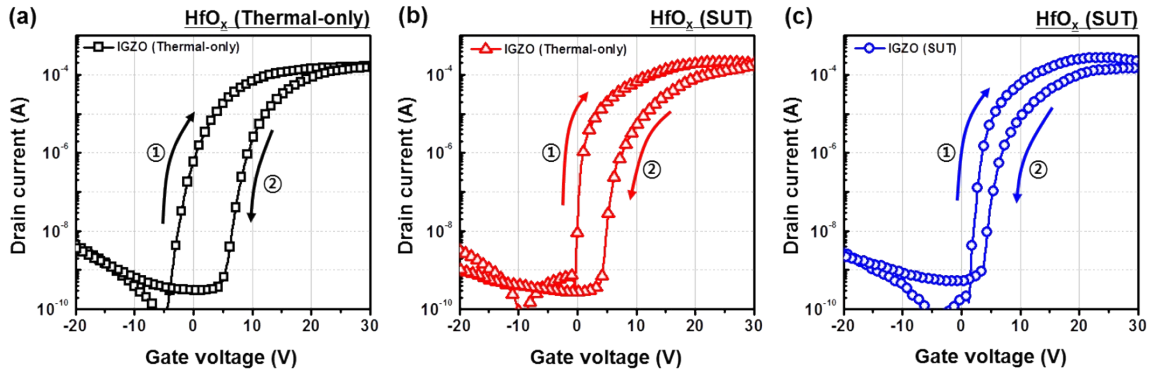

**Figure S3.** Hysteresis of thermal-only (both  $\text{HfO}_x$  and IGZO), SUT ( $\text{HfO}_x$ ) and thermal-only (IGZO), and SUT (both  $\text{HfO}_x$  and IGZO) treated IGZO TFTs

Hysteresis width are defined as the voltage difference at  $I_{DS} = 10^{-8}$  A. As a result, hysteresis widths of thermal-only ( $\text{HfO}_x$  and IGZO), SUT ( $\text{HfO}_x$ ) and thermal-only (IGZO), and SUT ( $\text{HfO}_x$  and IGZO) treated IGZO TFTs are 9.1, 4.9, 2.1 V, respectively.

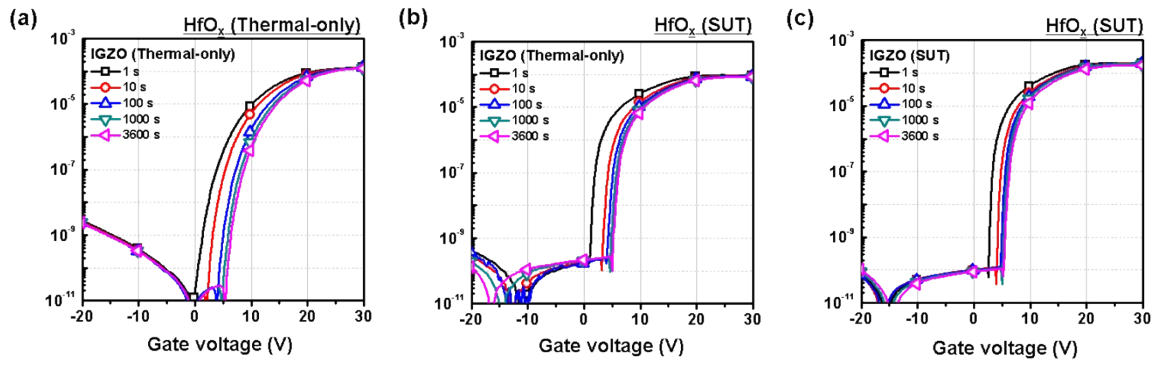

**Figure S4.**  $V_{th}$  shift under PBS test of thermal-only (both  $HfO_x$  and IGZO), SUT ( $HfO_x$ ) and thermal-only (IGZO), and SUT (both  $HfO_x$  and IGZO) treated IGZO TFTs

In results of the PBS test, negative  $V_{th}$  shifts of thermal-only (both  $HfO_x$  and IGZO), SUT ( $HfO_x$ ) and thermal-only (IGZO), and SUT (both  $HfO_x$  and IGZO) treated IGZO TFTs are 5.21, 3.89, 2.72 V, respectively.

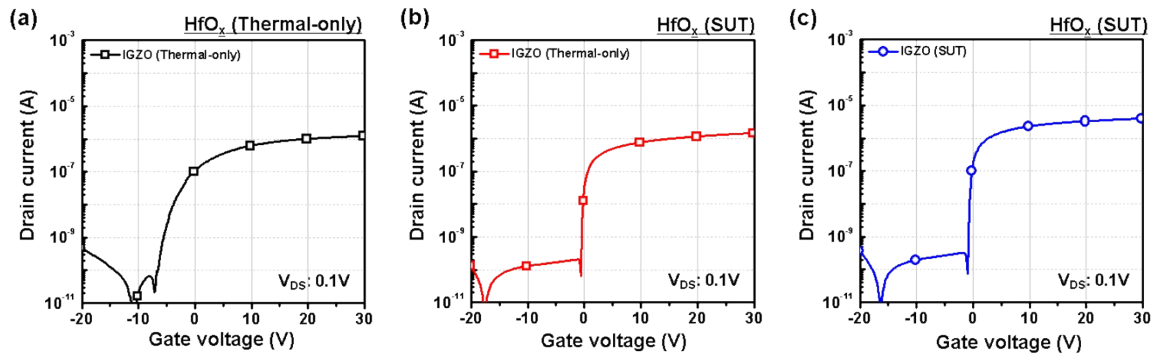

**Figure S5.** Transfer characteristics of thermal-only (both HfO<sub>x</sub> and IGZO), SUT (HfO<sub>x</sub>) and thermal-only (IGZO), and SUT (both HfO<sub>x</sub> and IGZO) treated IGZO TFTs at  $V_{DS}$  of 0.1 V
